# Supplementary material for: Whole-transcriptome sequencing identifies a distinct subtype of acute lymphoblastic leukemia with predominant genomic abnormalities of EP300 and CREBBP
Source: HighWire-hosted journal article supplement (doi:10.1101/gr.209163.116), 2016-11-30
Supplement: Supplemental_Table_S1.xlsx [file Supplemental_Table_S1.xlsx]

## Sheet: Table S1A
Supplemental Table S1A. Clinical characteristics of ALL cases in the whole transcriptome sequencing study
	Treatment protocol			ZNF384 Status		Entire cohort (n=231)
	Ma-Spore ALL 2003 (n=199)	Other (n=32)		Rearranged (n=11)	Wild type (n=220)
Age at diagnosis (years)	4.6 (0.2-15.2)	4.7 (0.8-18.4)		7.7 (2.1-14.5)	4.5 (0.2-18.4)	4.6 (0.2-18.4)
5-year EFS (95% CI)	0.83 (0.77-0.88)	0.84 (0.66-0.93)		0.90 (0.47-0.99)	0.83 (0.77-0.87)	0.83 (0.78-0.88)
Gender
Female	80 (40.2%)	12 (37.5%)		4 (36.4%)	88 (40.0%)	139 (60.2%)
Male	119 (59.8%)	20 (62.5%)		7 (63.6%)	132 (60.0%)	92 (39.8%)
Race
Chinese	89 (44.7%)	10 (31.2%)		7 (63.6%)	92 (41.8%)	99 (42.9%)
Malay	75 (37.7%)	9 (28.1%)		1 (9.1%)	83 (37.7%)	84 (36.4%)
Indonesian	0 (0.0%)	3 (9.4%)		0 (0.0%)	3 (1.4%)	3 (1.3%)
Indian	19 (9.5%)	0 (0.0%)		0 (0.0%)	19 (8.6%)	19 (8.2%)
Filipino *	0 (0.0%)	1 (3.1%)		1 (9.1%)	0 (0.0%)	1 (0.4%)
Caucasian	0 (0.0%)	1 (3.1%)		0 (0.0%)	1 (0.5%)	1 (0.4%)
Others	16 (8.0%)	8 (25.0%)		2 (18.2%)	22 (10.0%)	24 (10.4%)
Leucocyte count at diagnosis (x109 cell per L)
≥50	68 (34.2%)	8 (25.0%)		3 (27.3%)	73 (33.2%)	76 (32.9%)
<50	131 (65.8%)	23 (71.9%)		8 (72.7%)	146 (66.4%)	154 (66.7%)
Unknown	0 (0.0%)	1 (3.1%)		0 (0.0%)	1 (0.5%)	1 (0.4%)
Lineage
B-ALL	176 (88.4%)	28 (87.5%)		11 (100.0%)	193 (87.7%)	204 (88.3%)
T-ALL	23 (11.6%)	4 (12.5%)		0 (0.0%)	27 (12.3%)	27 (11.7%)
NCI grade
Standard	95 (47.7%)	18 (56.2%)		5 (45.5%)	108 (49.1%)	113 (48.9%)
High	104 (52.3%)	12 (37.5%)		6 (54.5%)	110 (50.0%)	116 (50.2%)
Unknown	0 (0.0%)	2 (6.2%)		0 (0.0%)	2 (0.9%)	2 (0.9%)
Prednisone response (day 8)
Good	173 (86.9%)	24 (75.0%)		11 (100.0%)	186 (84.5%)	197 (85.3%)
Poor	26 (13.1%)	4 (12.5%)		0 (0.0%)	30 (13.6%)	30 (13.0%)
Unknown	0 (0.0%)	4 (12.5%)		0 (0.0%)	4 (1.8%)	4 (1.7%)
MRD (day 33)
Positive	121 (60.8%)	14 (43.8%)		9 (81.8%)	126 (57.3%)	135 (58.4%)
Negative	73 (36.7%)	16 (50.0%)		2 (18.2%)	87 (39.5%)	89 (38.5%)
Unknown	5 (2.5%)	2 (6.2%)		0 (0.0%)	7 (3.2%)	7 (3.0%)
EFS, event free survival; CI, confidence interval; NCI, National Cancer Institute; MRD, minimal residual disease; Values represent median (min-max) for age, probability (95% CI) for EFS, or number of patients (%) for others; *, P < 0.05 (Fisher's exact test). Prednisone response was defined as good or poor for those with absolute blast count < or ≥ 1,000/ul in peripheral blood after 7 days of ora…

## Sheet: Table S1B
Supplemental Table S1B. Clinical characteristics of ZNF384-rearranged ALLs
Patient ID	Fusion	Gender	Age at diagnosis	Race	Leucocyte count at diagnosis (x109 cell per L)	Lineage	Immunophenotype	Karyotype	Treatment protocol	Prednisolone response (day 8)	MRD (day 33)	Events
SJ013489	CREBBP-ZNF384	Male	9.97	Others	83.6	B	HLA-DR+/CD34+/CD10-/CD19+/CD22+/CD79a+/cyIgM-/Tdt+/CD3-/CD5-/CD13+/CD14-/CD117-	46,XY,del(12)(p11.2)[2]/46,XY[38]	Ma-Spore ALL 2003	Good	>=0.01% & <1%	Abandonment
SJ013460	EP300-ZNF384	Female	6.84	Chinese	41.5	B	HLA-DR+/CD34+/CD10-/CD19+/CD22+/CD79a+	46,XX[20]	Ma-Spore ALL 2003	Good	>=0.01% & <1%	CCR
SJ013526	EP300-ZNF384	Male	14.54	Chinese	48.29	B	HLA-DR+/CD34+/CD38+/CD10-/CD19+/CD20-/CD22+/cyCD79a+/cyIgM-/cyCD3-/CD2-/CD5-/CD7-/CD13dim/CD15dim/CD33+/MPO-	46,XY,add(8)(q13),inv(12)(p13q24.1)[6]/46,XY[13]	Ma-Spore ALL 2003	Good	>=0.01% & <1%	CCR
SJ013538	EP300-ZNF384	Male	5.75	Chinese	15.3	B	HLA-DR+/CD34+/CD10+/CD19+/CD22+/CD79a+	45,X,-Y,i(3)(q10),del(6)(p11.2),add(12)(p11.2),-13,?del(13)(q12q22),+mar[8]/46,XY[22]	Ma-Spore ALL 2003	Good	<0.01%	CCR
SJ013570	EP300-ZNF384	Male	9.61	Others	21.1	B	HLA-DR+/CD34+/CD10+/CD19+/CD22+/CD79a+/cyIgM-/Tdt+/CD3-/CD5-/CD13+/CD14-/CD117-/MPO-	46~47,XY,t(7;20)(p?13;p?11.2),add(9)(p?21)[13],del(9)(p21)[12],der(11)del(11)(p?14)del(11)(q21q23)[15],+add(19)(p13.3)[9][cp20], 11q23 abnormality	Ma-Spore ALL 2003	Good	>=0.01% & <1%	CCR
SJ015391	EP300-ZNF384	Female	8.48	Chinese	36.7	B	HLA-DR+/CD34+/CD10-/CD19+/CD22+/CD79a+		Ma-Spore ALL 2003	Good	>=0.01% & <1%	CCR
SJ015441	EP300-ZNF384	Male	7.69	Chinese	41.3	B	HLA-DR+/CD34+/CD10+/CD19+/CD20-/CD79a+/cyIgM-/cyIgG-/Tdtdim/CD7dim/CD3-/MPO-	46,XY[20]	Others	Good	<0.01%	CCR
SJ015420	TAF15-ZNF384	Female	9.87	Malay	4.9	B	HLA-DR+/CD34+/CD10+/CD19+/CD22+/CD79a+		Ma-Spore ALL 2003	Good	>=0.01% & <1%	CCR
SJ013474	TCF3-ZNF384	Male	2.12	Chinese	140	B	HLA-DR+/CD34+/CD10-/CD19+/CD22+/CD79a+	46,XY[16]	Ma-Spore ALL 2003	Good	>=0.01% & <1%	CCR
SJ015451	TCF3-ZNF384	Female	2.3	Filipino	57.04	B	HLA-DR+/CD34+/CD38+/CD10-/CD19+/CD20-/CD22dim/cyCD79a+/cyIgM-/cyCD3-/CD2-/CD5-/CD7-/CD13+/CD15dim/CD33+/MPO-	46,XX[20]	Other	Good	>=1%	CCR
SJ015482	TCF3-ZNF384	Male	5.53	Chinese	5.45	B	HLA-DR+/CD34+/CD38+/CD10-/CD19+/CD20-/CD22dim/cyCD79adim/cyIgM-/cyCD3-/CD2-/CD5-/CD7-/CD13dim/CD15dim/CD33+/MPO-	46,XY,add(16)(q24)[1]/46,XY[19]	Ma-Spore ALL 2003	Good	>=1%	Resistance
CCR, continuous complete remission; MRD, minimal residual disease; Resistance, ≥ 5% blasts in bone marrow at day 33 at the end of protocol; Abandonment, absence from scheduled therapy for > 6 weeks
