# Supplementary material for: Whole-transcriptome sequencing identifies a distinct subtype of acute lymphoblastic leukemia with predominant genomic abnormalities of EP300 and CREBBP
Source: HighWire-hosted journal article supplement (doi:10.1101/gr.209163.116), 2016-11-30
Supplement: Supplemental_Table_S4.xlsx [file Supplemental_Table_S4.xlsx]

## Sheet: Table S4
Supplemental Table S4. Differentially expressed genes related to ZNF384-rearranged ALL
1Score, fold change, and q-value (false discovery rate) were estimated by using the SAM algorithm. Fold change refers to the ratio of expression in ZNF384-rearrranged vs. other ALL.
2"Body" refers to genomic locus for a gene, including exonic and intronic regions; "PR" and "EN" denote gene promoter and enhancer, respectively
Gene Name	Score(d)1	Fold Change1	q-value(%)1	Type	ZNF384 binding2
CLCF1	2.9	16.5	0	over-expressed	Body/PR
BTLA	2.9	16	0	over-expressed	Body/PR/EN
CNN3	2.9	18.5	0	over-expressed
TESK2	2.9	2.8	0	over-expressed	Body
PHLDB3	2.9	3.4	0	over-expressed
PXDC1	2.9	7.4	0	over-expressed
FRMD4A	2.9	4.9	0	over-expressed	Body
SPHK1	2.9	6.3	0	over-expressed
SALL4	2.8	20.4	0	over-expressed
TIGD3	2.8	4.3	0	over-expressed	EN
CHST12	2.8	5.5	0	over-expressed	Body
MBOAT7	2.8	2.7	0	over-expressed
DAPK1	2.8	5.7	0	over-expressed	Body
NRARP	2.8	8.4	0	over-expressed
SLC2A3	2.8	6.2	0	over-expressed	EN/PR
ATP9A	2.8	9.7	0	over-expressed	Body/EN
FAM124B	2.8	4.9	0	over-expressed
ITGA9	2.8	6.8	0	over-expressed
ABCC1	2.8	2.8	0	over-expressed	Body
MVD	2.8	2	0	over-expressed	Body
LOC101927181	2.8	3.9	0	over-expressed	Body
GATA3	2.7	12.4	0	over-expressed	Body
F11R	2.7	2.6	0	over-expressed	EN
SLC35D2	2.7	3.7	0	over-expressed
RIN3	2.7	6.5	0	over-expressed	Body
RPH3AL	2.7	5.7	0	over-expressed
OLFML2A	2.7	7.1	0	over-expressed
ARFGAP3	2.7	2.1	0	over-expressed
CDC14B	2.7	7.5	0	over-expressed	Body
MTURN	2.7	5.5	0	over-expressed	EN
FOSL2	2.7	12.4	0	over-expressed
TNRC18	2.7	2.7	0	over-expressed	Body/PR
FURIN	2.7	2.8	0	over-expressed
MOB3B	2.7	2.9	0	over-expressed	EN
MOB3A	2.7	5.2	0	over-expressed	Body/EN
HEATR5B	2.6	2.1	0	over-expressed
HIP1	2.6	3.4	0	over-expressed	Body/PR
CREB5	2.6	5.9	0	over-expressed	Body/PR
GPM6B	2.6	6.6	0	over-expressed	EN
GPR183	2.6	10.6	0	over-expressed	PR
RGS18	2.6	6.7	0	over-expressed
TPD52L2	2.6	2	0	over-expressed
SUSD1	2.6	2	0	over-expressed	Body
ORAI1	2.6	2.7	0	over-expressed	EN
SFXN3	2.6	3.3	0	over-expressed	EN
RAB13	2.6	2.4	0	over-expressed	PR
VNN1	2.6	9.1	0	over-expressed
MBOAT1	2.6	2.5	0	over-expressed
METTL7A	2.6	3.9	0	over-expressed	PR
RUNX2	2.6	6.5	0	over-expressed
EMR2	2.6	4.8	0	over-expressed
GOLIM4	2.6	4	0	over-expressed
TFPI	2.6	11.5	0	over-expressed
PPP1R3G	2.6	5.7	0	over-expressed
CD33	2.6	7	0	over-expressed
FLT3	2.6	6.8	0	over-expressed	Body
FES	2.6	2.6	0	over-expressed	EN
SLC39A3	2.6	2.9	0	over-expressed
RILPL2	2.6	3.3	0	over-expressed	Body
TMCC3	2.6	5.5	0	over-expressed	EN
CEBPA	2.6	8.8	0	over-expressed
NR4A1	2.6	13.2	0	over-expressed	Body
GAS2L1	2.6	3.4	0	over-expressed
HSH2D	2.6	5	0	over-expressed	Body
SKI	2.6	4.2	0	over-expressed	Body
FXYD5	2.6	2	0	over-expressed	Body
ZYX	2.6	3	0	over-expressed	PR
DNAJC1	2.6	3	0	over-expressed	Body
ZBTB46	2.5	3.9	0	over-expressed	Body
BCAS4	2.5	3.2	0	over-expressed	Body/PR
LOC400927	2.5	2.5	0	over-expressed	Body
MYRIP	2.5	5.8	0	over-expressed	Body
DLGAP3	2.5	4.5	0	over-expressed
NFIX	2.5	3.7	0	over-expressed	PR
RAP1B	2.5	2	0	over-expressed	Body/EN
SH2B3	2.5	4.2	0	over-expressed	Body/EN
TPM4	2.5	2.3	0	over-expressed	Body
FRMD8	2.5	2	0	over-expressed	Body
C15orf39	2.5	3.4	0	over-expressed
HAAO	2.5	2.6	0	over-expressed	EN/Body/PR
AP1B1	2.5	2.8	0	over-expressed
NR4A2	2.5	13.7	0	over-expressed	EN/PR
TGFB1	2.5	2.3	0	over-expressed
ITGA6	2.5	8.8	0	over-expressed	Body
STAT2	2.5	2	0	over-expressed
ATF3	2.5	5.4	0	over-expressed	Body/PR
RGS1	2.5	17.7	0	over-expressed	Body/EN/EN
ADK	2.5	2.4	0	over-expressed	Body
MMP2	2.5	6.7	0	over-expressed
MAFF	2.5	8.3	0	over-expressed
CD302	2.5	3.6	0	over-expressed
MMP11	2.5	3.6	0	over-expressed	PR
SNX30	2.5	2.9	0	over-expressed	Body
ETHE1	2.4	2	0	over-expressed	Body
SLC30A1	2.4	2.4	0	over-expressed	PR
ABHD17C	2.4	6.7	0	over-expressed
MAP3K8	2.4	4.5	0	over-expressed	EN/Body
SNHG7	2.4	2.2	0	over-expressed
STK17B	2.4	2.7	0	over-expressed	Body/EN
ITGAE	2.4	2.9	0	over-expressed	Body
DENND1B	2.4	2.2	0	over-expressed
SCN1B	2.4	5.5	0	over-expressed
DOK2	2.4	3.7	0	over-expressed	PR
HGF	2.4	3.7	0	over-expressed	PR
NLRP3	2.4	3	0	over-expressed	EN/Body
JOSD1	2.4	2.3	0	over-expressed
TNFSF9	2.4	3.8	0	over-expressed	EN/EN
ENTPD1	2.4	2.4	0	over-expressed	Body
TOB1	2.4	3.4	0	over-expressed
LYN	2.4	2.4	0	over-expressed	EN/Body/EN
ID2	2.4	5.3	0	over-expressed
C9orf89	2.3	2.2	0	over-expressed
AGPAT2	2.3	2	0	over-expressed	EN
IQGAP2	2.3	2.5	0	over-expressed	PR
ITPKB	2.3	2	0	over-expressed	PR
PPP1R16B	2.3	2.8	0	over-expressed	Body
PTPRD	2.3	5.7	0	over-expressed	Body
LATS2	2.3	3.2	0	over-expressed
PLCG2	2.3	2.1	0	over-expressed	EN/Body
CBX4	2.3	4	0	over-expressed	Body
DERL3	2.3	2.8	0	over-expressed
ADCY6	2.3	2.8	0	over-expressed
SERPINB6	2.3	3.2	0	over-expressed
TEX30	2.3	2.8	0	over-expressed
LDLR	2.3	3.2	0	over-expressed	Body
TJP2	2.3	2.5	0	over-expressed	Body
LPPR2	2.3	2.3	0	over-expressed
RAB3D	2.3	2.3	0	over-expressed
PTGR1	2.3	3.1	0	over-expressed	Body
TTC7B	2.3	2.3	0	over-expressed
CARD11	2.3	2.6	0	over-expressed	EN/Body/EN
GADD45B	2.3	3.5	0	over-expressed	PR
RNASE6	2.3	5.7	0	over-expressed	PR
FHL3	2.3	2.6	0	over-expressed
DEF8	2.2	4	0	over-expressed
LRRK1	2.2	2.3	0	over-expressed	Body
BHLHE40	2.2	4.4	0	over-expressed	PR
SLC45A3	2.2	3.2	0	over-expressed
RASGEF1B	2.2	3.3	0	over-expressed
ID1	2.2	3.4	0	over-expressed
PIM3	2.2	2.4	0	over-expressed	EN
LGALS2	2.2	4.7	0	over-expressed	EN/PR
MKNK2	2.2	2.1	0	over-expressed	Body/EN
MED26	2.2	2.1	0	over-expressed	Body
SCN3A	2.2	5.8	0	over-expressed	PR
SPOCK2	2.2	3.7	0	over-expressed	PR/EN
SNAI1	2.2	6.5	0	over-expressed
SESN2	2.2	3	0	over-expressed
CD36	2.2	4.4	0	over-expressed
EMILIN2	2.2	2.8	0	over-expressed
ESAM	2.2	6.4	0	over-expressed
NR4A3	2.2	7	0	over-expressed
SNHG16	2.2	2.1	0	over-expressed
SLC7A5	2.2	3.4	0	over-expressed	Body/EN
LTBR	2.1	2.5	0	over-expressed
NPDC1	2.1	5.4	0	over-expressed	PR
ANTXR2	2.1	2.5	0	over-expressed	Body/PR
ZNF321P	2.1	2.2	0	over-expressed
PCDH10	2.1	6.5	0	over-expressed	Body
HBEGF	2.1	5.4	0	over-expressed	EN
LPAR6	2.1	4	0	over-expressed
DLL1	2.1	5.1	0	over-expressed
TMEM173	2.1	2.7	0	over-expressed
ALCAM	2.1	2.5	0	over-expressed	Body/EN
CEBPB	2.1	3.6	0	over-expressed
AAED1	2.1	3	0	over-expressed
CEACAM1	2.1	3	0	over-expressed	Body
SPP1	2.1	4.2	0	over-expressed
ICAM4	2.1	2.3	0	over-expressed
ANPEP	2.1	2.8	0	over-expressed	EN
RIPK2	2.1	2	0	over-expressed	Body
JMJD6	2.1	2.3	0	over-expressed
PALM	2.1	4.5	0	over-expressed	Body
SIK1	2.1	5.3	0	over-expressed	Body/EN
LMO2	2.1	2.5	0	over-expressed	EN
SLC7A7	2.1	3.1	0	over-expressed	Body/PR
SPG20	2.1	3	0	over-expressed
CD34	2.1	7.4	0	over-expressed
SELL	2.1	3.7	0	over-expressed	Body/EN
HS3ST3B1	2.1	2.4	0	over-expressed
LYST	2.1	2.5	0	over-expressed	Body
KLF10	2	2.6	0	over-expressed	EN
BCL3	2	2.7	0	over-expressed	EN
GRASP	2	5.2	0	over-expressed
MCL1	2	2.3	0	over-expressed	PR
ZMYM6	2	2.1	0	over-expressed	PR
MGC12916	2	2.5	0	over-expressed
TMEM156	2	2.5	0	over-expressed	Body/PR
OSM	2	4.2	0	over-expressed
RAB40B	2	2.2	0	over-expressed	Body
NSMF	2	2.1	0	over-expressed	EN
NFKBID	2	2.7	0	over-expressed	Body/PR
SLC9A3R2	2	3.2	0	over-expressed
FSCN1	2	3.7	0	over-expressed	EN/EN
ZFP36	2	2.8	0	over-expressed
SERPINF1	2	2.3	0	over-expressed
CLIP2	2	2.3	0	over-expressed	EN
JUNB	2	3.2	0	over-expressed	EN
EGR3	2	3.4	0	over-expressed
TBC1D16	2	2.6	0	over-expressed
LTBP3	2	2.2	0	over-expressed	PR
SAMSN1	2	3.3	0	over-expressed	Body/PR/EN
CREM	1.9	2	0	over-expressed	Body/PR
PER1	1.9	3.8	0	over-expressed
CD300LF	1.9	2.4	0	over-expressed
ADAM15	1.9	2.1	0	over-expressed
RGS2	1.9	5.6	0	over-expressed
ACP5	1.9	3.1	0	over-expressed	EN/Body
MMP14	1.9	3.8	0	over-expressed
KLF2	1.9	2.9	0	over-expressed
PRSS57	1.9	4.3	0	over-expressed
S100A4	1.9	3.3	0	over-expressed
DDIT4	1.9	3.4	0	over-expressed	EN/EN
RAB20	1.9	3.6	0	over-expressed	PR
C20orf27	1.9	2.1	0	over-expressed
B4GALT1	1.9	2.3	0	over-expressed	Body
CD48	1.9	2.3	0	over-expressed	PR
SOCS3	1.9	4	0	over-expressed
TRIM58	1.9	2.5	0	over-expressed
TTC28	1.9	2.7	0	over-expressed	Body
GPR114	1.9	2.6	0	over-expressed
PRKAR2B	1.9	2.9	0	over-expressed	Body
CD83	1.9	2.7	0	over-expressed	EN
FTH1	1.9	2.1	0	over-expressed
IRS2	1.9	3.2	0	over-expressed
EHD2	1.9	4.6	0	over-expressed	Body
TBKBP1	1.9	2.4	0	over-expressed	PR
HAGHL	1.9	2.2	0	over-expressed
NFKBIZ	1.9	2.5	0	over-expressed	Body/PR
PLAUR	1.9	2.6	0	over-expressed
CFP	1.9	2.7	0	over-expressed
GBP2	1.9	2.4	0	over-expressed	EN
SEL1L3	1.9	2.8	0	over-expressed	EN
DUSP5	1.8	3.2	0	over-expressed	Body/EN
USP36	1.8	2.6	0	over-expressed	Body
LSP1	1.8	3	0	over-expressed	EN/PR
NDRG1	1.8	2.6	0	over-expressed
EVA1B	1.8	2.2	0	over-expressed
FOSB	1.8	4.5	0	over-expressed	EN
HHEX	1.8	2.1	0	over-expressed	EN
TAF13	1.8	2.7	0	over-expressed
CD44	1.8	2.5	0	over-expressed	Body
LINC00152	1.8	3	0	over-expressed	PR
THEMIS2	1.8	2.2	0	over-expressed	Body
GLIPR1	1.8	2	0	over-expressed
MACROD2	1.8	3.3	0	over-expressed	Body
MALAT1	1.8	2.3	0	over-expressed	Body/EN/EN
MN1	1.7	3	0	over-expressed
P2RX5	1.7	3.3	0	over-expressed	Body
POMC	1.7	2.8	0	over-expressed	EN
IRF8	1.7	3.2	0	over-expressed	Body/EN
LRRC70	1.7	2.1	0	over-expressed	PR
ANXA2	1.7	3	0	over-expressed	PR/EN
DIRAS1	1.7	3.1	0	over-expressed
PDE4B	1.7	3.3	0	over-expressed	Body
IRF7	1.7	2.1	0	over-expressed	PR
HTRA3	1.7	3	0	over-expressed
CDKN1A	1.7	3	0	over-expressed	Body
QSOX2	1.7	2.3	0	over-expressed
TPTEP1	1.7	3.4	0	over-expressed
CRIP2	1.7	2.8	0	over-expressed
PLP2	1.7	2.3	0	over-expressed	PR
IFI30	1.7	2.5	0	over-expressed	EN
STAB1	1.7	2.8	0	over-expressed
MXRA7	1.7	2.4	0	over-expressed
PFKFB3	1.7	2.8	0	over-expressed	EN
STAG3	1.7	3.1	0	over-expressed	Body
ETV3	1.7	2.6	0	over-expressed
KLF3	1.7	2.1	0	over-expressed
S100A16	1.7	11.8	0	over-expressed
CYTIP	1.6	2.5	0	over-expressed	EN/Body/PR/EN
GSN	-1.6	0.4	0	under-expressed
RAG1	-1.6	0.3	0	under-expressed
C8orf82	-1.6	0.4	0	under-expressed
CSRP2	-1.7	0.4	0	under-expressed
C4orf32	-1.7	0.4	0	under-expressed
POU2AF1	-1.7	0.5	0	under-expressed	Body
RMI2	-1.8	0.4	0	under-expressed	EN/EN
ZWINT	-1.8	0.5	0	under-expressed
IL7R	-1.8	0.4	0	under-expressed	EN
LINC00426	-1.8	0.5	0	under-expressed	EN
PLXND1	-1.8	0.4	0	under-expressed
BIN1	-1.8	0.5	0	under-expressed
CD24	-1.8	0.5	0	under-expressed
E2F2	-1.8	0.5	0	under-expressed	PR
TCL1A	-1.9	0.4	0	under-expressed	EN
SLFN13	-1.9	0.4	0	under-expressed
ZAP70	-1.9	0.5	0	under-expressed
IGF2R	-1.9	0.3	0	under-expressed	Body
STIM2	-1.9	0.4	0	under-expressed	Body/EN/PR
IFI27L2	-1.9	0.3	0	under-expressed	PR
CDCA7	-1.9	0.4	0	under-expressed
CSF2RB	-1.9	0.4	0	under-expressed
NEDD9	-1.9	0.5	0	under-expressed	Body/PR
GLUL	-1.9	0.4	0	under-expressed
GOLGA8B	-1.9	0.4	0	under-expressed
PRDX1	-1.9	0.4	0	under-expressed
BOLA1	-1.9	0.5	0	under-expressed
PIM1	-1.9	0.4	0	under-expressed	Body/EN
FAM64A	-2	0.4	0	under-expressed
GGH	-2	0.3	0	under-expressed
SLFN11	-2	0.4	0	under-expressed	PR
RFTN1	-2	0.4	0	under-expressed	Body/EN
KIAA0922	-2	0.5	0	under-expressed	EN/Body
DCAF12	-2	0.5	0	under-expressed	Body
PLD6	-2	0.4	0	under-expressed
FAM110A	-2	0.4	0	under-expressed	EN/PR
EDEM1	-2	0.5	0	under-expressed
NDFIP1	-2	0.4	0	under-expressed
TMEM263	-2.1	0.5	0	under-expressed
PGM1	-2.1	0.4	0	under-expressed	Body
LDLRAD4	-2.1	0.5	0	under-expressed	Body/PR
GCHFR	-2.1	0.3	0	under-expressed
WEE1	-2.1	0.5	0	under-expressed	EN/PR
WWC3	-2.1	0.4	0	under-expressed	Body
BAHCC1	-2.1	0.3	0	under-expressed
CHST2	-2.1	0.2	0	under-expressed
MAGEH1	-2.1	0.5	0	under-expressed
PMM1	-2.1	0.5	0	under-expressed
SEPT1	-2.1	0.4	0	under-expressed
FBXO25	-2.1	0.4	0	under-expressed
NREP	-2.2	0.4	0	under-expressed	PR
QRSL1	-2.2	0.4	0	under-expressed	Body
MME	-2.2	0.1	0	under-expressed
SEC11C	-2.2	0.3	0	under-expressed	Body
HMCES	-2.2	0.5	0	under-expressed	Body
HMGB3	-2.2	0.4	0	under-expressed
CCND3	-2.2	0.4	0	under-expressed
LEF1	-2.2	0.3	0	under-expressed	Body
ATP6V0E2	-2.2	0.4	0	under-expressed
SLAIN1	-2.3	0.3	0	under-expressed	Body
STK39	-2.3	0.5	0	under-expressed	Body
MAGED1	-2.3	0.4	0	under-expressed	PR
FGFR1	-2.3	0.2	0	under-expressed
SUCLG2	-2.3	0.3	0	under-expressed	Body
RALGPS2	-2.3	0.3	0	under-expressed
TMSB4X	-2.3	0.4	0	under-expressed	Body/EN/EN
MAGEF1	-2.3	0.3	0	under-expressed	PR
H6PD	-2.4	0.4	0	under-expressed
SYNE2	-2.4	0.4	0	under-expressed	Body
MAGED2	-2.5	0.5	0	under-expressed
CERK	-2.5	0.5	0	under-expressed	Body
RAB43	-2.5	0.4	0	under-expressed
TRIP6	-2.5	0.4	0	under-expressed
CBX1	-2.5	0.1	0	under-expressed	PR
CNR2	-2.5	0.2	0	under-expressed	Body/EN
PHGDH	-2.5	0.1	0	under-expressed
LBH	-2.5	0.4	0	under-expressed	EN
LRIG1	-2.6	0.2	0	under-expressed	Body
SFXN1	-2.6	0.3	0	under-expressed
CHCHD7	-2.6	0.4	0	under-expressed
GCSAM	-2.7	0.3	0	under-expressed
MFGE8	-2.8	0.3	0	under-expressed	EN
