# Supplementary material for: Whole-transcriptome sequencing identifies a distinct subtype of acute lymphoblastic leukemia with predominant genomic abnormalities of EP300 and CREBBP
Source: HighWire-hosted journal article supplement (doi:10.1101/gr.209163.116), 2016-11-30
Supplement: Supplemental_Table_S5.xlsx [file Supplemental_Table_S5.xlsx]

## Sheet: Table S5
Supplemental Table S5. Primer sequences used for fusion gene validation by PCR and Sanger sequencing
Fusion gene (breakpoint coordinate)	Forward primer sequence (5’ to 3’)	Reverse primer sequence (5’ to 3’)
ABCD3-KMT2E (1:94884848-7:104707253)	CGATTCCCGACTAACTGCTATT	GCAACATATTGACTGCATGGG
AFF1-NUTM1 (4:88053015-15:34642904)	AATCCTTCTCAGATGCCACAG	ATCATCCGGTCAAAGTTGCT
ARHGDIB-ETV6 (12:15114470-12:12037378)	CTCATTGACTTCCTTCCTGTTCT	AGTCCGTTGGGATCCACTAT
CDK6-LOC101927497 (7:92252349-7:92484222)	TTCGTGGAAGTTCAGATGTTGA	TTCATCACTGTTATCACCTCACC
CEP192-LDHB (18:13019204-12:21807610)	TGGAGATAGTAGAAGGTACACAGA	ACTTGTCCAACACCCACTAC
COQ7-ENSG00000260352 (16:19079058-16:18948177)	AGTTCCGTTCAACGAAGTGG	AGCTGGATGGAGACAGTCATA
CREBBP-ZNF384 (16:3827613-12:6788690)	AACGGAGGTCGCGTTTAC	GGACTCTGTGTCCATACTGATG
CXCR4-TSC22D3 (2:136875615-X:106959179)	CAGAAACTTCAGTTTGTTGGCT	TGGCCTGTTCGATCTTGTT
DOCK8-ENSG00000204794 (9:304703-9:68792074)	AAACCAAGGAAGTCCAGAAATC	ATCCCTTGGCTGGAAAGT
E2F4-RPL14 (16:67229779-3:40503538)	GATAGCAAGGACAGTGGTGAG	TTTGGAGCAGGTGCTTTCT
EIF3M-WT1-AS (11:32615494-11:32473566)	GGTGGAATTGCTCGGAAGTTA	GGCTTCTTAGCCTTCCACTTC
ELMO1-NKX2-1 (7:37382216-14:36988574)	GCACTGAGTGACTTCTCTTTCT	CCTCCATGCCCACTTTCTT
ELMO1-SFTA3 (7:37382216-14:36960495)	GCATCTGCACTGAGTGACTT	CAAATCCTGATAATTGGAGCCATTC
EP300-ZNF384 (22:41527636-12:6788690)	AGCTCCATAGAAAGAGCCTATG	GGGATAGAAGGCCAGAAGTA
ETS2-ETV6 (21:40178043-12:12037378)	TTACTTCCTCCAGAGACTGACG	AGTCCGTTGGGATCCACTAT
ETV6-ENSG00000256377 (12:12022902-12:27857856)	CATCATGCACCCTCTGATCC	TTCAGGAGTGTCTCCTCTATCC
ETV6-PDGFRB (12:12006494-5:149506176)	ATGTGCTCTATGAACTCCTTCAG	GATGATAAGGGAGATGATGGTGAG
ETV6-REP15 (12:12022902-12:27849910)	ATTTCAAACAGTCCAGGCTCTC	CCAAGATGACCAAGCACCAA
ETV6-RUNX1 (12:11905512-21:36265259)	TCGACGCCACTTCATGTTC	CAACGCCTCGCTCATCTT
ETV6-RUNX1 (12:12022902-21:36265259)	CATCATGCACCCTCTGATCC	CAACGCCTCGCTCATCTT
FIGNL1-IKZF1 (7:50514829-7:50435703)	CTCTAGATCTGTGCACCTGAGT	GAAAGATTTGGGAATTATTGCATGG
FLT1-STAU1 (13:28902757-20:47790731)	CTCTGAGGACGGTGGCT	ACCTCTCAGAACTGAACAAAGAC
HBS1L-AHI1 (6:135360710-6:135679324)	GAGATGCTGTGCCAGATGAA	GTTGGTGCTGTATCTACCTGATG
HIATL1-LOC100132077 (9:97200809-9:97101117)	ATTGGTGCCCTGTCTGATG	GTCCATGGTTCTGAGCTTGA
IGHM-CRLF2 (14:106322321-X:1324225)	GAAAGTGATGGAGTCGGGAAG	AACCAGTGTGCGTGTAAGAG
IGHM-PHAX (14:106586297-5:125952941)	TAGAAGGTGTCCAGTGTGAGG	CCTCGCTGATACTAGGAGTGTT
IGKV2D-30-EIF2AK3 (2:89976353-2:88895402)	TGATGACTCAGTCTCCACTCT	ATGTACTCCAGCCTCCTTCT
LOC728084-IKZF1 (12:89409249-7:50444638)	GTACTGCTCATGCAAAGGAAATG	AAAGAAGCCACACTGGTAAGG
MED17-LMO1 (11:93517928-11:8252050)	GCTGTCCATGTCGCAGAA	GGTTGGCCTTGGTGTAGAG
MEF2D-BCL9 (1:156449081-1:147095642)	GTGACCTGAACAGTGCTAAC	ATTGTGTGACATCAAGCCA
MEF2D-BCL9 (1:156449377-1:147094071)	GTGTCCAATCAGAGCTCACT	GCAAACTTGGACATTCGAGAC
MLLT10-EED (10:21906135-11:85961409)	CAAAGTTTAAGTGATTCTTCCTCTCAC	GACGCTGTCAGTATAGAAAGTGG
MYB-PLAGL1 (6:135520187-6:144263799)	CTCAGACTTGGAAATGCCTTCT	CCCAGCATGGTGTTGTACTT
NDUFA9-DYRK4 (12:4778982-12:4714079)	GTCGTAGATGTATCCAAAGGAATTG	GGTAGCCCGTGTACAACT
NGEF-INPP5D (2:233800705-2:233995357)	TTCATCCACAGAGTATGGGTTTC	AGAAGAGCATCTTAAGGCCATC
NUP214-ABL1 (9:134106155-9:133730187)	AGCAACACCACATCCTTCG	CACTCTCACGCACCAAGAA
NUP93-SUGCT (16:56832448-7:40393535)	GGCTTCCTGAAGAATGAGAAGG	ATTGGATATACTGGGTTTGTTTCAG
PAX5-CBFA2T2 (9:37002644-20:32194761)	CTTTCTCCGCGCAGTGT	CTCGGTCCTCCAGGATTTATTG
PAX5-FBRSL1 (9:36966545-12:133148873)	CTTCCGGGCAGAGACTTC	GAAGAAACTCACGCTGGAATG
PAX5-NOL4L (9:36882000-20:31044197)	TGACTTGGCGAGCACGA	TAGGAGGCTGTGCCAAGTG
PAX5-NOL4L (9:37002644-20:31035618)	CCTCGGTGAGCACGGATT	TAGCCCGCGATGAGCTG
PICALM-MLLT10 (11:85685750-10:21940601)	CCTCCACAAATGGGAAGTGT	GATGGTTCTGGCTGCTTCTT
PIM3-ZBED4 (22:50356912-22:50283268)	CAGCAGCGAGAGCTTGT	TTCAAGTAGTGAGAGTCGTGTG
PQLC1-CTDP1 (18:77679183-18:77455224)	CTACATCACCTACCTGTCCATTG	GAGGTCTTGGCCACATTCA
PRRC2C-PRLR (1:171454873-5:35089764)	AAAGTGCTTTGGCGGTTTG	CAGAAGGCAGGTGTTGAGAA
PTEN-EXTL2 (10:89624380-1:101360341)	CAGACATGACAGCCATCATCA	GAGTGCAGTAGATTGCAGTAGG
RAG1-HAND1 (11:36595507-5:153857456)	CGATGTGAAGGCAGATGTTG	CTGGCGTCAGGACCATAG
RNF138-RNF125 (18:29672848-18:29648260)	ATGGCCGAGGACCTCTC	CAGCATCTTAAATGGTGCAATTC
RNF168-SMCO1 (3:196229743-3:196235201)	TGTTGGATGCTCCTGTTCTC	GTACAGAGGCTAAGGTTGGAAG
RSRP1-TMEM50A (1:25663530-1:25669451)	CACATGCGATCACACAGAGA	ATTAGGAAGGCTATGGTTGCTATAA
RSRP1-TMEM50A (1:25663530-1:25678116)	CACATGCGATCACACAGAGA	CTGTTTGACCCAGACAACCT
RSRP1-TMEM50A (1:25664559-1:25669451)	CGTCGGGAGTGCTAGTTTG	TAACACCACAGGCATGGTATG
RUNX1-ARHGDIB (21:36421138-12:15103657)	CTGAAACAGTGACCTGTCTTG	GTGGTGGAGGCTTATAATTGAG
RUNX1-ATF7IP (21:36421138-12:14576842)	CTGAAACAGTGACCTGTCTTG	GCCATTTAACAGCTTGACATCAG
RUNX1-BAZ2A (21:36421138-12:57011315)	CTGAAACAGTGACCTGTCTTG	TCATGGGAGACCCGTTAGT
RUNX1-ETS2 (21:36421138-21:40181958)	CTGAAACAGTGACCTGTCTTG	CTTGAGTGTCCCTCTGTAACTG
RUNX1-MRPL47 (21:36421138-3:179306782)	CTGAAACAGTGACCTGTCTTG	TTTGGGCTTCAGCAAGATG
RUNX1-PCNT (21:36421138-21:47832793)	CTGAAACAGTGACCTGTCTTG	CATGCTCAGCTTTCCTCTGT
SF3A2-FNBP1 (19:2236899-9:132658274)	AGAGGGCCCGTCTCATT	TTGTCCAAACAGACTTCGACATA
SUZ12P1-ENSG00000231421 (17:29036828-17:28901002)	GGAAGGAAGGGACACGGA	GACCTGCTCACAGAAGGAGA
TAF15-ZNF384 (17:34165556-12:6788690)	AGGACACAGGAAAGCCAAAG	GGCAACAGCTGATCCTTCAT
TBC1D15-RAB21 (12:72274386-12:72175810)	GAAAGAGGTCATCGAGGATCAG	GACTCTGCTTCTTGAATGGAAAC
TBL1XR1-LINC00578 (3:176767784-3:177469698)	ATCTTAGTGAGAACAGCACCAG	CACTTTGAATTCAGCATGTCAGAT
TCF3-PBX1 (19:1619109-1:164761730)	ACCAGCCTCATGCACAAC	GAATGCTCCACTGAGTTGTCT
TCF3-ZNF384 (19:1615684-12:6782605)	AGATCAAGCGGGAGGAGAA	CGAAGGTCTTGGAGCAATGT
TCF3-ZNF384 (19:1621836-12:6797391)	GCATGGAGCAGAGGTGAAC	GGCAACAGCTGATCCTTCAT
TCF7-SPI1 (5:133473854-11:47381590)	TACCCTCATCCCAGTGTCTT	GAGCTCCGTGAAGTTGTTCT
TLR1-BICD1 (4:38806374-12:32480394)	CAGTGAAATAAATTCAAGGAAGTGC	ATGGCATTGACGTGCTCT
TRDV3-TARP (14:22938032-7:38309140)	GGGATAACAGCAGATCAGAAGG	CCGATACTTACCTGTGACAACAA
WDFY1-SERPINE2 (2:224763674-2:224842343)	CTCAGTATGCTTTCGTTGGTGA	GGTCTGTCTACTATAAACCAGGGA
ZNF608-ARL14EPL (5:124036706-5:115389710)	TTGGTTCGGACTCGTTCT	ATTCATTCATCTTTGACATCCG
ZNF618-NUTM1 (9:116798656-15:34640169)	TGGGATCCAGTTCCAGTTCTA	AGAGGGTTGTCTGGAGAGAATA
ZNF720-IGKV2-24 (16:31724755-2:89476568)	CCTTTGTTGGCTGCAGTAAG	CTAATTAGGACTCCTCAGGTCAC
ZNF720-IGKV2D-24 (16:31724755-2:90043681)	AGAGCTCAGTCTCTTCACCA	TCTACACCACTGCACCCA
