# Supplementary material for: Whole-transcriptome sequencing identifies a distinct subtype of acute lymphoblastic leukemia with predominant genomic abnormalities of EP300 and CREBBP
Source: HighWire-hosted journal article supplement (doi:10.1101/gr.209163.116), 2016-11-30
Supplement: Supplemental_Table_S6.xlsx [file Supplemental_Table_S6.xlsx]

## Sheet: Table S6
Supplemental Table S6. Primer sequences for cloning
Name	Sequence (5' to 3')
pGL3-BTLA-p-Kpn-Nhe-F	AACATTTCTCTATCGATAGGTACCAGTGCTTCCTGTCACTCATTTTCT
pGL3-BTLA-p-Kpn-Nhe-R	GATCTCGAGCCCGGGCTAGCTATGGCAGCCAGAGCATTTTTGCA
pGL3-BTLA-p+e-Xho-Hin-F	ATAGCTAGCCCGGGCTCGAGTGTAGATTTATGCCCTGTGTATTCTTGGCA
pGL3-BTLA-p+e-Xho-Hin-R	AGTACCGGAATGCCAAGCTTCAGATGGTATGTTCTGCCTTACTTTAGAAGG
pGL3-CLCF1-p-Kpn-Nhe-F	AACATTTCTCTATCGATAGGTACCGGTCACTGGAGGAAGAATGAAGAACC
pGL3-CLCF1-p-Kpn-Nhe-R	GATCTCGAGCCCGGGCTAGCGATCTCGTGGCTGCTTGGC
pGL3-CLCF1-p+e-Nhe-Bgl-F	GCAGCCACGAGATCGCTAGCGAGTCTTGCATCCTTCCTAGTTATTAGCC
pGL3-CLCF1-p+e-Nhe-Bgl-R	CAAGCTTACTTAGATCGCAGATCTGAGTTTGGACATCCCAGGATACCAG
pGL3-BTLA-p+e-Frag 1-F	AACATTTCTCTATCGATAGGTACCAGTGCTTCCTGTCACTCATTTTCT
pGL3-BTLA-p+e-Frag 1-R	TAAATCTACATATGGCAGCCAGAGCATTTTTGC
pGL3-BTLA-p+e-Frag 2-F	GGCTGCCATATGTAGATTTATGCCCTGTGTATTCTTGGC
pGL3-BTLA-p+e-Frag 2-R	GCTTACTTAGATCGCAGATCTCGAGCAGATGGTATGTTCTGCCTTACTTTAGAAGG
pGL3-CLCF1-p+e-Frag 1-F	GCAAGTGCAGGTGCCAGAACATTTCTCTATCGATAGGTACCGGTCACTGGAGGAAGAATGAAGAACC
pGL3-CLCF1-p+e-Frag 1-R	CTAGGAAGGATGCAAGACTCGATCTCGTGGCTGCTTGGC
pGL3-CLCF1-p+e-Frag 2-F	CGCCAAGCAGCCACGAGATCGAGTCTTGCATCCTTCCTAGTTATTAGCC
pGL3-CLCF1-p+e-Frag 2-R	CAACAGTACCGGAATGCCAAGCTTACTTAGATCGCAGATCTCGAGGAGTTTGGACATCCCAGGATACCAG
pGL3-BTLA-p-Kp-Xh-R	GCTTACTTAGATCGCAGATCTCGAGTATGGCAGCCAGAGCATTTTTGCAAG
pGL3-CLCF1-p-Kp-Xh-R	GCTTACTTAGATCGCAGATCTCGAGGATCTCGTGGCTGCTTGGC
tr-pGL3-BTLA-PR-F	GCTTTGCAGATCACAGTGGAAGCAAAGCCTTCTACT
tr-pGL3-BTLA-PR-R	AGTAGAAGGCTTTGCTTCCACTGTGATCTGCAAAGC
tr-pGL3-BTLA-EN-F	CAGAAATGTGGTGACATGAGGGTTACTTTAAGGAAAACCCTG
tr-pGL3-BTLA-EN-R	CAGGGTTTTCCTTAAAGTAACCCTCATGTCACCACATTTCTG
tr-pGL3-CLCF1-PR-F	GTAGGTTGGATCAGGGACCGCTACAATTTGTGGTTA
tr-pGL3-CLCF1-PR-R	TAACCACAAATTGTAGCGGTCCCTGATCCAACCTAC
tr-pGL3-CLCF1-EN-F	GATGTGGTGAGGTCTGGCCACCTTCTCTTTCC
tr-pGL3-CLCF1-EN-R	GGAAAGAGAAGGTGGCCAGACCTCACCACATC
pG3-IL3-p-Kpn-Xho-F	AACATTTCTCTATCGATAGGTACCCCTCAGACCATGCCAATTCTGC
pG3-IL3-p-Kpn-Xho-R	GCTTACTTAGATCGCAGATCTCGAGGCCAGTCTTATCCAAGCTACTCACC
pG3-CSF2-p-Kpn-Xho-F	AACATTTCTCTATCGATAGGTACGATTTCCTACTTCCACACTTCCACAGAAAG
pG3-CSF2-p-Kpn-Xho-R	GCTTACTTAGATCGCAGATCGGCCCACATTCTCTCACTTACCA
Gib-len-CBP-flag-F	TTCTCTAGGCGCCGGAATTCATGGACTACAAAGACGATGACGACAAGGCTGAGAACTTGCTGGAC
Gib-len-CBP-R	GCATCTTCCATGGTGGAATTCCTACAAGCCCTCCACAAACTTCTCT
Gib-len-EP300-flag-F	TTCTCTAGGCGCCGGAATTCATGGACTACAAAGACGATGACGACAAGGCCGAGAATGTGGTGG
Gib-len-EP300-R	GCATCTTCCATGGTGGAATTCCTAGTGTATGTCTAGTGTACTCTGTGAGAGGTT
Gib-len-CP-Z-flag-F	TTCTCTAGGCGCCGGAATTCATGGACTACAAAGACGATGACGACAAGGCTGAGAACTTGCTGGAC
Gib-len-CP-Z-R	GCATCTTCCATGGTGGAATTCCTAAGAGCTGGCCAGGTGC
Gib-len-EP-Z-flag-F	TTCTCTAGGCGCCGGAATTCATGGACTACAAAGACGATGACGACAAGGCCGAGAATGTGGTGG
Gib-len-EP-Z-R	GCATCTTCCATGGTGGAATTCCTAAGAGCTGGCCAGGTGC
Gib-len-TA-Z-flag-F	TTCTCTAGGCGCCGGAATTCATGGACTACAAAGACGATGACGACAAGTCGGATTCTGGAAGTTACGGT
Gib-len-TA-Z-R	GCATCTTCCATGGTGGAATTCCTAAGAGCTGGCCAGGTGC
Gib-len-TC-Z-flag-F	TTCTCTAGGCGCCGGAATTCATGGACTACAAAGACGATGACGACAAGAACCAGCCGCAGAGG
Gib-len-TC-Z-R	GCATCTTCCATGGTGGAATTCCTAAGAGCTGGCCAGGTGC
Gib-len-trEP300-flag-F	TTCTCTAGGCGCCGGAATTCATGGACTACAAAGACGATGACGACAAGGCCGAGAATGTGGTGG
Gib-len-trEP300-R	GCATCTTCCATGGTGGAATTCCTACATGTTGCTCATGGGCCG
Gib-len-trCBP-flag-F	TTCTCTAGGCGCCGGAATTCATGGACTACAAAGACGATGACGACAAGGCTGAGAACTTGCTGGAC
Gib-len-trCBP-R	GCATCTTCCATGGTGGAATTCCTATTGAGAAACTTGCATGCGATTCACT
Gib-len-ZNF384-flag-F	TTCTCTAGGCGCCGGAATTCATGGACTACAAAGACGATGACGACAAGGAAGAATCTCACTTCAATTCTAACCCG
Gib-len-ZNF384-R	GCATCTTCCATGGTGGAATTCCTAAGAGCTGGCCAGGTGC
pCDNA3.1-EPZ-Bam-Xho-F	TTGGTACCGAGCTCGGATCCATGGACTACAAAGACGATGACGACAAGGCTGAGAACTTGCTGGAC
pCDNA3.1-EPZ-Bam-Xho-R	ACGGGCCCTCTAGACTCGAGCTACAAGCCCTCCACAAACTTCTCT
pCDNA3.1-wtZNF384-Bam-Xho-F	TTGGTACCGAGCTCGGATCCATGGACTACAAAGACGATGACGACAAGGAAGAATCTCACTTCAATTCTAACCCG
pCDNA3.1-wtZNF384-Bam-Xho-R	ACGGGCCCTCTAGACTCGAGCTAAGAGCTGGCCAGGTGC
pFastBac-HOM-EPZ-F	ATGGCCGAGAATGTGGTGG
pFastBac-HOM-EPZ-R	CTAAGAGCTGGCCAGGTGC
pFastBac-HOM-trEP300-F	ATGGCCGAGAATGTGGTGG
pFastBac-HOM-trEP300-R	CTACATGTTGCTCATGGGCCG
pFastBac-HOM-CPZ-F	ATGGCTGAGAACTTGCTGGAC
pFastBac-HOM-CPZ-R	CTAAGAGCTGGCCAGGTGC
pFastBac-HOM-CBP-F	ATGGCTGAGAACTTGCTGGAC
pFastBac-HOM-CBP-R	CTATTGAGAAACTTGCATGCGATTCACT
pFastBac-HOM-trCBP-F	ATGGCTGAGAACTTGCTGGAC
pFastBac-HOM-trCBP-R	CTATTGAGAAACTTGCATGCGATTCACT
